# Supplementary material for: Antidiabetic effects of isolated sterols from Ficus racemosa leaves
Source: Royal Society of Chemistry journal article supplement (doi:10.1039/c5ra00790a), 2015-01-01
Supplement: c5ra00790a1.pdf [file c5ra00790a1.pdf]

### Supplementary Materials

FR1: Melting point: 140°C. <sup>1</sup>H NMR (CDCl<sub>3</sub>, 300 MHz) δ: 0.72 (3H, s), 0.81 (3H, s), 0.86 (3H, s), 0.91 (3H, s), 0.97 (3H, s), 1.02 (3H, s), 1.14-2.11 (30H, m), 3.6 (1H, dd, J = 3 Hz), 5.3 (1H, t, J = 3, 6 Hz). <sup>13</sup>C NMR (CDCl<sub>3</sub>, 75 MHz) δ: 11.87, 18.79, 19.40, 19.82, 21.09, 24.31, 25.41, 26.11, 28.25, 28.91, 29.18, 31.68, 31.92, 33.97, 36.15, 36.52, 37.27, 39.70, 40.48, 42.32, 45.86, 51.25, 55.98, 56.08, 56.88, 71.82, 121.72, 138.32, 140.77. MS (ESI-) *m/z* (M-H)<sup>-</sup> 413.2.

FR2: Melting point: 161°C <sup>1</sup>H NMR (CDCl<sub>3</sub>, 300 MHz) δ: 0.69 (3H, s), 0.76 (3H, s), 0.80 (3H, s), 0.82 (3H, s), 0.85 (2H, m), 1.00 (3H, s), 1.02 (3H, s), 1.15-1.18 (7H, m), 1.41-1.50 (12H, m), 1.51-1.55 (2H, m), 1.84-1.90 (2H, m), 1.96-1.99 (2H, m), 2.26-2.28 (1H, m), 3.50-3.52 (1H, m), 5.04 (1H, dd, J = 6 Hz), 5.14 (1H, dd, J = 6 Hz), 5.35 (1H, d, J = 3 Hz). <sup>13</sup>C NMR (CDCl<sub>3</sub>, 75 MHz) δ: 12.05, 12.23, 18.98, 19.39, 21.07, 21.21, 24.36, 25.40, 28.91, 30.90, 31.67, 31.90, 36.52, 37.27, 39.69, 40.48, 42.22, 42.31, 50.18, 51.24, 53.41, 55.97, 56.88, 121.68, 129.29, 138.31, 140.78. MS (ESI+) *m/z* (M+H)<sup>+</sup> 413.2.

FR3: Melting point: 137°C. <sup>1</sup>H NMR (CDCl<sub>3</sub>, 300 MHz) δ: 0.59 (3H, s), 0.88 (3H, s), 0.93 (3H, s), 1.09 (3H, s), 1.15 (3H, s), 1.17-1.20 (8H, m), 1.22 (3H, s), 1.26-1.34 (6H, m), 1.41 (3H, s), 1.46-1.52 (6H, m), 1.65 (3H, s), 1.67-1.70 (4H, m), 3.24 (1H, d, J = 3 Hz), 5.12 (1H, t, J = 6 Hz). <sup>13</sup>C NMR (CDCl<sub>3</sub>, 75 MHz) δ: 15.42, 15.76, 17.63, 18.27, 18.65, 19.15, 21.02, 22.83, 24.11, 24.93, 25.72, 26.52, 27.87, 28.21, 29.70, 30.86, 31.02, 35.61, 36.27, 36.49, 37.04, 38.90, 39.53, 44.50, 49.83, 50.43, 50.53, 79.02, 125.26, 134.43. MS (ESI-) *m/z* (M+H)<sup>+</sup> 427.7.
